# Supplementary material
Source: MDPI journal article supplement (https://www.mdpi.com/2073-4352/11/12/1469)
Supplement: s1 [file s1]

## SUPPLEMENTARY MATERIALS

for:

Raman Response of Quantum Critical Ferroelectric Pb-doped SrTiO<sub>3</sub>

Ekaterina D. Linnik <sup>1,2</sup>, Alexey S. Mikheykin <sup>1</sup>, Diego Rubi <sup>3</sup>, Vladimir B. Shirokov <sup>4</sup>, Daoud Mezzane <sup>2,5</sup>, Svitlana V. Kondovych <sup>2</sup>, Igor A. Lukyanchuk <sup>1,2</sup>, Anna G. Razumnaya <sup>1,\*</sup>

<sup>1</sup> Faculty of Physics, Southern Federal University, Rostov-on-Don 344090, Russia

<sup>2</sup> Laboratoire de Physique de la Matière Condensée, Université de Picardie Jules Verne, Amiens 80080, France

<sup>3</sup> Instituto de Nanociencia y Nanotecnología, CONICET-CNEA, San Martín 1650, Argentina

<sup>4</sup> Southern Scientific Center of Russian Academy of Science, Rostov-on-Don 344006, Russia

<sup>5</sup> IMED-Lab, Cadi Ayyad University, Marrakesh 40000, Morocco

\* Correspondence: razumnaya1@gmail.com; Tel.: +7(918) 551 85 52

Synchrotron powder diffraction data collected at the P24 (EH2) PETRA III beamline, DESY (Hamburg, Germany) using the 2-D marCCD 165 detector. The monochromatic beam at wavelength  $\lambda = 0.5607$  Å was slitted down to  $300 \times 300$  µm<sup>2</sup>. 200-µm-diameter glass capillaries were used for mounting finely ground powder samples. The sample-to-detector distance ( $D \approx 75$  mm), the wavelength and the detector parameters were calibrated using a LaB<sub>6</sub> NIST reference powder sample; calibration and subsequent integration were performed using Dioptas software [17].

Powder diffraction data refinement was carried out using FullProf suit [18]. The refined parameters were unit cell dimensions, background, and profile parameters (profile match known as Le Bail fitting). The pseudo-Voigt profile is used to model the Bragg reflection profile, which is linear combination of Gaussian and Lorentzian model function with mixing coefficient  $\eta$ :

$$pV(2\theta) = \eta L(2\theta) + (1-\eta)G(2\theta) \quad 0 \leq \eta \leq 1 \quad (1)$$

It is well known that intrinsic and extrinsic factors contribute to the broadening of the line profile of Bragg reflections. The extrinsic factor is the contribution from the diffractometer, which, as a result of convolution with the intrinsic profile, gives the observed diffraction pattern. Intrinsic contributions are from the features of the sample, namely, from the small size of the coherent scattering regions and strain in the crystal structure of the sample. The instrumental resolution function (IRF) was calculated from LaB<sub>6</sub> NIST powder diffraction pattern to consider the contribution of the diffractometer to the broadening of the diffraction pattern profile. Taking into account the IRF made it possible to determine the intrinsic parameters of the sample, which affect the broadening of the line profile. In our case, we did not consider the contribution from the size effect, since the grains of the ceramic sample prepared by the standard ceramic technology were more than 200 nanometers.

The intrinsic profile of a particular reflection due to a strain effect has an integral breadth  $\beta_{strain}$ . Fullprof software used the so-called maximum strain, which is derived from the integral breadth  $\beta_{strain}$  as

$$\varepsilon = \frac{\Delta d}{d} = \frac{1}{2} \beta_{strain} d_{hkl} \quad (2)$$

The integral width is calculated individually for each peak, which makes it possible to estimate not only the magnitude of microstrain, but also anisotropy. The results of refining the model of the line profile of the diffraction pattern from the studied samples are shown in Figures S1-S3. At 250 K, all samples are perfectly indexed using a cubic crystal structure model with space group  $Pm\bar{3}m$ . Lattice parameters, maximal strains with anisotropy and refined parameters of fits presented in Table S1.

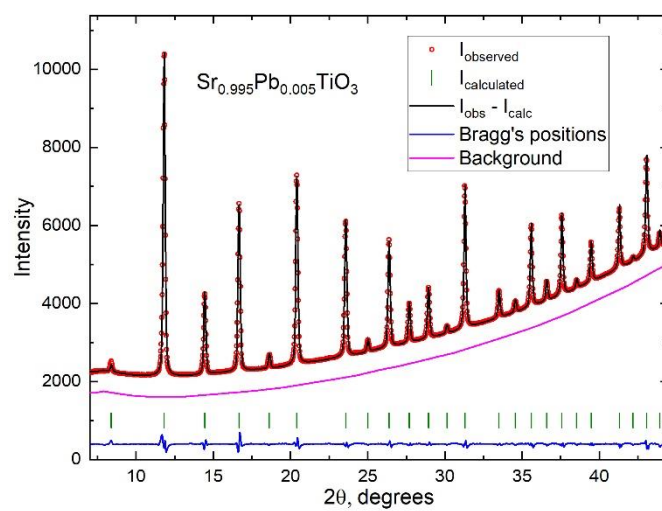

**Figure S1:** Diffraction pattern and refined model of profile for  $\text{Sr}_{1-x}\text{Pb}_x\text{TiO}_3$  with  $x = 0.005$

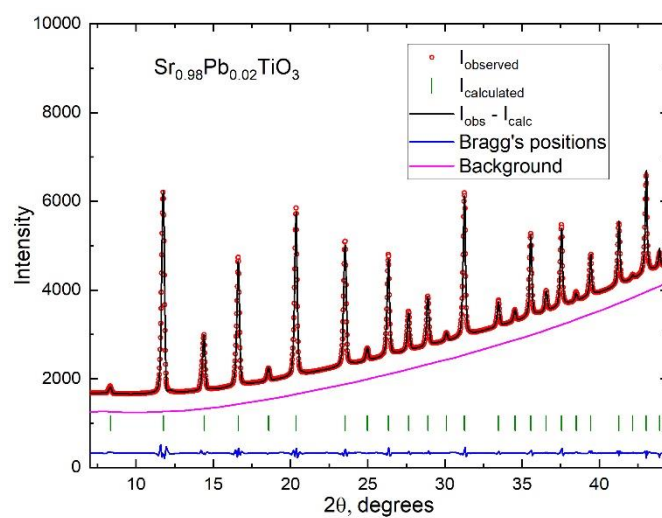

**Figure S2:** Diffraction pattern and refined model of profile for  $\text{Sr}_{1-x}\text{Pb}_x\text{TiO}_3$  with  $x = 0.02$

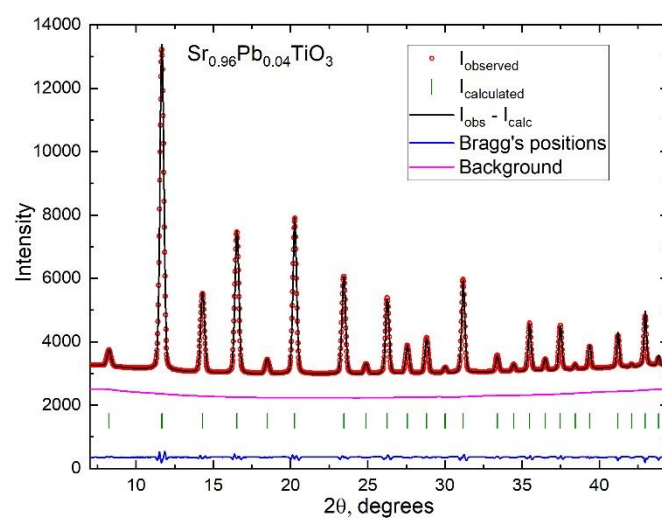

**Figure S3:** Diffraction pattern and refined model of profile for  $\text{Sr}_{1-x}\text{Pb}_x\text{TiO}_3$  with  $x = 0.04$

**Table S1:** Refined lattice parameters from Le Bail fit, maximal strain with anisotropy and reliability factors with all non-excluded points

| Parameter                                            | $\text{Sr}_{1-x}\text{Pb}_x\text{TiO}_3$ |            |            |
|------------------------------------------------------|------------------------------------------|------------|------------|
|                                                      | $x = 0,005$                              | $x = 0,02$ | $x = 0,04$ |
| Lattice constant $a$ , Å                             | 3,910(1)                                 | 3,908(1)   | 3,903(1)   |
| Maximal strain $\epsilon$ , %%<br>( $\times 10000$ ) | 7.2619                                   | 18.2894    | 29.1573    |
| Anisotropy of strain, %%                             | 0.0510                                   | 0.3578     | 0.9077     |
| $R_p$ , %                                            | 0.436                                    | 0.371      | 0.395      |
| $R_{wp}$ , %                                         | 0.819                                    | 0.699      | 0.614      |
| $R_{exp}$                                            | 1.70                                     | 1.85       | 1.70       |
| $\chi^2$                                             | 0.233                                    | 0.144      | 0.131      |
| Bragg R-factor, %                                    | 0.084                                    | 0.124      | 0.112      |

## References

17. Prescher, C., Prakapenka, V. B. DIOPTAS : a program for reduction of two-dimensional X-ray diffraction data and data exploration. *High Pressure Research* **2015**, *35*, 223–230.
18. Rodriguez-Carvajal, J. Recent developments of the program FULLPROF. *Comm. Powder Diffraction (IUCr) Newsl.* **2001**, *26*, 12–19.
